# Supplementary material for: The effect of induced blur on the Beery-Buktenica developmental test of visual-motor integration and its supplemental tests
Source: PLoS One. 2020 Aug 20;15(8):e0237807. doi: 10.1371/journal.pone.0237807 (PMC7446883; doi:10.1371/journal.pone.0237807)
Supplement: S1 Dataset — (XLSX) [file pone.0237807.s001.xlsx]

## Sheet: Participant details
Group	Participant	DOB	Sex	VA Right	VA Left	VA Binoc	Induced Blur Monoc Sphere	Induced Blur Binoc Sph Right	Induced Blur Binoc Sph Left	Induced Blur Cyl Right	Induced Blur Cyl Left
Child	C1	2007-08-28	F	-0.08	-0.08	-0.14	2.25	2.25	2.25	1.5	1.5
Child	C2	2010-09-30	F	0.02	0.02	0.02	2	2.25	2.25	1.5	1.5
Child	C3	2010-11-04	F	0.04	0.1	0	3.75	3.75	3.5	1.5	1.5
Child	C4	2007-08-17	F	0.4	0	0	2	2.25	2.25	2	1.5
Child	C5	2009-03-25	M	0	0	0	2	2	2	2	1.5
Child	C6	2006-04-07	M	-0.1	-0.1	-0.2	3.5	4	4.5	3	3
Child	C7	2010-09-27	F	0.1	0.04	0	3.5	3.75	3.75	4	4
Child	C8	2005-04-07	M	-0.08	-0.2	-0.2	2.75	2.75	3	2	2
Child	C9	2007-06-29	F	-0.04	-0.1	-0.1	3	3	2.5	2	2
Child	C10	2008-11-18	M	-0.1	0	-0.1	3.75	3.75	3.75	2.5	2.5
Child	C11	2011-06-02	F	0.1	0.1	0.06	3.25	3.75	4.25	2.5	3
Child	C12	2007-05-12	M	0.04	0.02	-0.14	3.25	3.25	3.25	2.5	2.5
Child	C13	2008-04-04	F	0.08	0.06	-0.08	2.5	2.5	2.25	2	2.5
Child	C14	2007-09-02	M	-0.18	-0.16	-0.3	2.5	2.5	3	1.5	1.5
Child	C15	2006-02-07	F	-0.1	-0.1	-0.18	3.25	3.25	3.5	2	2.5
Child	C16	2010-05-24	F	0.02	0.06	-0.04	2.75	2.75	2.75	1.5	1.5
Child	C17	2009-01-06	M	0	0	0	3	3	3	3	3
Child	C18	2005-10-23	M	0.1	0.1	0.02	2.75	2.75	2.5	2	1
Child	C19	2011-03-24	F	0.1	0.1	0.08	3.25	3.25	3.5	2	2.5
Child	C20	2009-11-26	F	0.02	0	-0.1	2.75	2.75	3	1	1
Adult	A1	1989-04-09	F	-0.1	-0.2	-0.2	1.75	1.75	2	3	3
Adult	A2	1993-05-26	F	-0.04	-0.1	-0.1	2.25	2.75	2.5	1.5	1.5
Adult	A3	1978-03-23	M	0.02	0	0	2.5	2.5	2.25	2	2
Adult	A4	1980-06-10	F	-0.04	-0.1	-0.18	2.5	3	3	1.5	2
Adult	A5	1980-06-29	M	-0.06	-0.04	-0.08	3	3	3	1.5	1.5
Adult	A6	1996-02-16	F	0.02	-0.08	-0.1	2.5	2.5	2.5	1.5	1.5
Adult	A7	1974-10-09	M	-0.04	-0.06	-0.06	2.75	3	3	1.5	1.5
Adult	A8	1978-06-06	F	0	0	0	1.75	1.75	2	2	2
Adult	A9	1977-06-14	F	0.02	0.02	0.02	2.75	2.75	3	2.5	2.5
Adult	A10	1979-04-26	M	-0.02	-0.1	-0.1	3.5	3.5	2.5	1.5	1.5
Adult	A11	1986-07-21	F	0.04	0.12	-0.16	3.25	3.25	3.5	1.5	1
Adult	A12	1974-06-30	M	0.1	0.1	0.1	1.75	1.75	1.75	3	3
Adult	A13	1983-12-23	F	-0.16	-0.14	-0.2	4.25	4.5	4.25	3	2.5
Adult	A14	1972-12-28	F	-0.14	-0.12	-0.16	2	2	2.25	2	2
Adult	A15	1986-02-28	F	-0.08	-0.1	-0.1	2	2	2	1.5	1.5
Adult	A17	1977-11-27	F	-0.2	-0.2	-0.2	2.5	2.5	2.5	1.5	1.5
Adult	A18	1973-06-25	F	0	0.1	-0.1	1.25	1.25	2.25	2.5	2.5
Adult	A19	1979-08-31	M	0.02	0.06	-0.04	2	2	2.25	2.5	3
Adult	A20	1981-03-04	M	-0.06	-0.06	-0.1	2.25	2.25	2.5	2	2

## Sheet: Experimental results
Group	Participant	DOB	Gender	Randomisation	DateofMeasurement	Age	Condition	Method	OrderofCondition	Raw Score	Standard Score
Child	C1	2007-08-28	F	DCAB	2018-04-16	10.6411	A	VMI	3	22	92
Child	C2	2010-09-30	F	ABDC	2018-02-25	7.41096	A	VMI	1	18	94
Child	C3	2010-11-04	F	ADBC	2018-02-25	7.31507	A	VMI	1	18	94
Child	C4	2007-08-17	F	CADB	2018-04-01	10.6301	A	VMI	2	24	97
Child	C5	2009-03-25	M	CBAD	2018-04-08	9.04384	A	VMI	3	21	94
Child	C6	2006-04-07	M	ABCD	2018-03-20	11.9589	A	VMI	1	21	83
Child	C7	2010-09-27	F	BACD	2018-04-04	7.52329	A	VMI	2	19	97
Child	C8	2005-04-07	M	DACB	2018-04-01	12.9918	A	VMI	2	22	82
Child	C9	2007-06-29	F	BCDA	2018-03-31	10.7616	A	VMI	4	21	87
Child	C10	2008-11-18	M	CADB	2018-04-06	9.3863	A	VMI	2	24	105
Child	C11	2011-06-02	F	BDCA	2018-08-12	7.2	A	VMI	4	21	106
Child	C12	2007-05-12	M	DACB	2018-04-03	10.9014	A	VMI	2	19	78
Child	C13	2008-04-04	F	ACDB	2018-03-26	9.98082	A	VMI	1	25	105
Child	C14	2007-09-02	M	BACD	2018-04-09	10.6082	A	VMI	2	24	98
Child	C15	2006-02-07	F	CDAB	2018-04-18	12.2	A	VMI	3	25	96
Child	C16	2010-05-24	F	DBAC	2018-09-19	8.32877	A	VMI	3	17	83
Child	C17	2009-01-06	M	BADC	2018-07-08	9.50685	A	VMI	2	15	68
Child	C18	2005-10-23	M	DABC	2018-07-08	12.7151	A	VMI	2	25	95
Child	C19	2011-03-24	F	CBDA	2018-07-22	7.33425	A	VMI	4	15	83
Child	C20	2009-11-26	F	ADCB	2018-07-28	8.67397	A	VMI	1	21	91
Child	C1	2007-08-28	F	DCAB	2018-08-26	11.0027	B	VMI	4	24	96
Child	C2	2010-09-30	F	ABDC	2018-03-04	7.43014	B	VMI	2	18	94
Child	C3	2010-11-04	F	ADBC	2018-04-11	7.43836	B	VMI	3	23	112
Child	C4	2007-08-17	F	CADB	2018-05-27	10.7836	B	VMI	4	22	91
Child	C5	2009-03-25	M	CBAD	2018-04-01	9.02466	B	VMI	2	20	92
Child	C6	2006-04-07	M	ABCD	2018-04-04	12	B	VMI	2	21	82
Child	C7	2010-09-27	F	BACD	2018-03-20	7.48219	B	VMI	1	19	97
Child	C8	2005-04-07	M	DACB	2018-04-15	13.0301	B	VMI	4	22	82
Child	C9	2007-06-29	F	BCDA	2018-03-23	10.7397	B	VMI	1	20	82
Child	C10	2008-11-18	M	CADB	2018-08-12	9.73699	B	VMI	4	23	99
Child	C11	2011-06-02	F	BDCA	2018-03-25	6.81644	B	VMI	1	18	97
Child	C12	2007-05-12	M	DACB	2018-09-28	11.389	B	VMI	4	25	99
Child	C13	2008-04-04	F	ACDB	2018-04-21	10.0521	B	VMI	4	21	90
Child	C14	2007-09-02	M	BACD	2018-03-26	10.5699	B	VMI	1	22	92
Child	C15	2006-02-07	F	CDAB	2018-05-21	12.2904	B	VMI	4	25	96
Child	C16	2010-05-24	F	DBAC	2018-08-08	8.2137	B	VMI	2	19	92
Child	C17	2009-01-06	M	BADC	2018-07-01	9.48767	B	VMI	1	20	89
Child	C18	2005-10-23	M	DABC	2018-07-15	12.7342	B	VMI	3	24	91
Child	C19	2011-03-24	F	CBDA	2018-07-08	7.29589	B	VMI	2	17	91
Child	C20	2009-11-26	F	ADCB	2018-09-15	8.80822	B	VMI	4	20	87
Child	C1	2007-08-28	F	DCAB	2018-03-10	10.5397	C	VMI	2	21	88
Child	C2	2010-09-30	F	ABDC	2018-03-26	7.49041	C	VMI	4	18	93
Child	C3	2010-11-04	F	ADBC	2018-06-04	7.5863	C	VMI	4	23	111
Child	C4	2007-08-17	F	CADB	2018-03-03	10.5507	C	VMI	1	25	103
Child	C5	2009-03-25	M	CBAD	2018-03-03	8.94521	C	VMI	1	20	92
Child	C6	2006-04-07	M	ABCD	2018-04-11	12.0192	C	VMI	3	20	77
Child	C7	2010-09-27	F	BACD	2018-04-11	7.54247	C	VMI	3	17	89
Child	C8	2005-04-07	M	DACB	2018-04-08	13.011	C	VMI	3	22	82
Child	C9	2007-06-29	F	BCDA	2018-04-15	10.8027	C	VMI	2	23	94
Child	C10	2008-11-18	M	CADB	2018-03-25	9.35342	C	VMI	1	19	86
Child	C11	2011-06-02	F	BDCA	2018-07-15	7.12329	C	VMI	3	19	100
Child	C12	2007-05-12	M	DACB	2018-07-15	11.1836	C	VMI	3	19	76
Child	C13	2008-04-04	F	ACDB	2018-04-03	10.0027	C	VMI	2	20	86
Child	C14	2007-09-02	M	BACD	2018-10-03	11.0932	C	VMI	3	18	72
Child	C15	2006-02-07	F	CDAB	2018-03-27	12.1397	C	VMI	1	19	72
Child	C16	2010-05-24	F	DBAC	2018-10-11	8.38904	C	VMI	4	17	83
Child	C17	2009-01-06	M	BADC	2018-07-22	9.54521	C	VMI	4	15	68
Child	C18	2005-10-23	M	DABC	2018-07-22	12.7534	C	VMI	4	21	79
Child	C19	2011-03-24	F	CBDA	2018-07-01	7.27671	C	VMI	1	15	84
Child	C20	2009-11-26	F	ADCB	2018-09-01	8.76986	C	VMI	3	20	88
Child	C1	2007-08-28	F	DCAB	2018-02-25	10.5041	D	VMI	1	24	98
Child	C2	2010-09-30	F	ABDC	2018-03-10	7.44658	D	VMI	3	16	87
Child	C3	2010-11-04	F	ADBC	2018-03-10	7.35068	D	VMI	2	18	94
Child	C4	2007-08-17	F	CADB	2018-04-08	10.6493	D	VMI	3	20	82
Child	C5	2009-03-25	M	CBAD	2018-05-27	9.17808	D	VMI	4	22	97
Child	C6	2006-04-07	M	ABCD	2018-06-01	12.1589	D	VMI	4	19	72
Child	C7	2010-09-27	F	BACD	2018-06-01	7.68219	D	VMI	4	17	88
Child	C8	2005-04-07	M	DACB	2018-03-23	12.9671	D	VMI	1	20	73
Child	C9	2007-06-29	F	BCDA	2018-03-23	10.7397	D	VMI	3	19	78
Child	C10	2008-11-18	M	CADB	2018-07-15	9.66027	D	VMI	3	22	95
Child	C11	2011-06-02	F	BDCA	2018-04-07	6.85205	D	VMI	2	17	94
Child	C12	2007-05-12	M	DACB	2018-03-26	10.8795	D	VMI	1	25	101
Child	C13	2008-04-04	F	ACDB	2018-04-21	10.0521	D	VMI	3	23	97
Child	C14	2007-09-02	M	BACD	2018-11-28	11.2466	D	VMI	4	18	72
Child	C15	2006-02-07	F	CDAB	2018-04-03	12.1589	D	VMI	2	26	100
Child	C16	2010-05-24	F	DBAC	2018-04-08	7.87945	D	VMI	1	18	91
Child	C17	2009-01-06	M	BADC	2018-07-15	9.52603	D	VMI	3	20	89
Child	C18	2005-10-23	M	DABC	2018-07-01	12.6959	D	VMI	1	24	91
Child	C19	2011-03-24	F	CBDA	2018-07-15	7.31507	D	VMI	3	15	83
Child	C20	2009-11-26	F	ADCB	2018-08-04	8.69315	D	VMI	2	21	91
Child	C1	2007-08-28	F	DCAB	2018-04-16	10.6411	A	VP	3	27	110
Child	C2	2010-09-30	F	ABDC	2018-02-25	7.41096	A	VP	1	17	85
Child	C3	2010-11-04	F	ADBC	2018-02-25	7.31507	A	VP	1	28	132
Child	C4	2007-08-17	F	CADB	2018-04-01	10.6301	A	VP	2	25	100
Child	C5	2009-03-25	M	CBAD	2018-04-08	9.04384	A	VP	3	24	102
Child	C6	2006-04-07	M	ABCD	2018-03-20	11.9589	A	VP	1	26	99
Child	C7	2010-09-27	F	BACD	2018-04-04	7.52329	A	VP	2	25	117
Child	C8	2005-04-07	M	DACB	2018-04-01	12.9918	A	VP	2	26	93
Child	C9	2007-06-29	F	BCDA	2018-03-31	10.7616	A	VP	4	27	108
Child	C10	2008-11-18	M	CADB	2018-04-06	9.3863	A	VP	2	26	109
Child	C11	2011-06-02	F	BDCA	2018-08-12	7.2	A	VP	4	21	104
Child	C12	2007-05-12	M	DACB	2018-04-03	10.9014	A	VP	2	27	108
Child	C13	2008-04-04	F	ACDB	2018-03-26	9.98082	A	VP	1	28	114
Child	C14	2007-09-02	M	BACD	2018-04-09	10.6082	A	VP	2	26	106
Child	C15	2006-02-07	F	CDAB	2018-04-18	12.2	A	VP	3	28	106
Child	C16	2010-05-24	F	DBAC	2018-09-19	8.32877	A	VP	3	25	109
Child	C17	2009-01-06	M	BADC	2018-07-08	9.50685	A	VP	2	28	117
Child	C18	2005-10-23	M	DABC	2018-07-08	12.7151	A	VP	2	27	99
Child	C19	2011-03-24	F	CBDA	2018-07-22	7.33425	A	VP	4	28	132
Child	C20	2009-11-26	F	ADCB	2018-07-28	8.67397	A	VP	1	26	108
Child	C1	2007-08-28	F	DCAB	2018-08-26	11.0027	B	VP	4	26	103
Child	C2	2010-09-30	F	ABDC	2018-03-04	7.43014	B	VP	2	11	52
Child	C3	2010-11-04	F	ADBC	2018-04-11	7.43836	B	VP	3	26	123
Child	C4	2007-08-17	F	CADB	2018-05-27	10.7836	B	VP	4	28	112
Child	C5	2009-03-25	M	CBAD	2018-04-01	9.02466	B	VP	2	26	110
Child	C6	2006-04-07	M	ABCD	2018-04-04	12	B	VP	2	27	102
Child	C7	2010-09-27	F	BACD	2018-03-20	7.48219	B	VP	1	23	109
Child	C8	2005-04-07	M	DACB	2018-04-15	13.0301	B	VP	4	27	97
Child	C9	2007-06-29	F	BCDA	2018-03-23	10.7397	B	VP	1	27	108
Child	C10	2008-11-18	M	CADB	2018-08-12	9.73699	B	VP	4	24	99
Child	C11	2011-06-02	F	BDCA	2018-03-25	6.81644	B	VP	1	25	124
Child	C12	2007-05-12	M	DACB	2018-09-28	11.389	B	VP	4	28	109
Child	C13	2008-04-04	F	ACDB	2018-04-21	10.0521	B	VP	4	26	107
Child	C14	2007-09-02	M	BACD	2018-03-26	10.5699	B	VP	1	29	118
Child	C15	2006-02-07	F	CDAB	2018-05-21	12.2904	B	VP	4	26	97
Child	C16	2010-05-24	F	DBAC	2018-08-08	8.2137	B	VP	2	21	96
Child	C17	2009-01-06	M	BADC	2018-07-01	9.48767	B	VP	1	29	122
Child	C18	2005-10-23	M	DABC	2018-07-15	12.7342	B	VP	3	28	104
Child	C19	2011-03-24	F	CBDA	2018-07-08	7.29589	B	VP	2	20	101
Child	C20	2009-11-26	F	ADCB	2018-09-15	8.80822	B	VP	4	26	108
Child	C1	2007-08-28	F	DCAB	2018-03-10	10.5397	C	VP	2	28	114
Child	C2	2010-09-30	F	ABDC	2018-03-26	7.49041	C	VP	4	22	106
Child	C3	2010-11-04	F	ADBC	2018-06-04	7.5863	C	VP	4	25	117
Child	C4	2007-08-17	F	CADB	2018-03-03	10.5507	C	VP	1	24	98
Child	C5	2009-03-25	M	CBAD	2018-03-03	8.94521	C	VP	1	26	110
Child	C6	2006-04-07	M	ABCD	2018-04-11	12.0192	C	VP	3	25	94
Child	C7	2010-09-27	F	BACD	2018-04-11	7.54247	C	VP	3	18	89
Child	C8	2005-04-07	M	DACB	2018-04-08	13.011	C	VP	3	25	89
Child	C9	2007-06-29	F	BCDA	2018-04-15	10.8027	C	VP	2	28	112
Child	C10	2008-11-18	M	CADB	2018-03-25	9.35342	C	VP	1	20	85
Child	C11	2011-06-02	F	BDCA	2018-07-15	7.12329	C	VP	3	21	104
Child	C12	2007-05-12	M	DACB	2018-07-15	11.1836	C	VP	3	26	103
Child	C13	2008-04-04	F	ACDB	2018-04-03	10.0027	C	VP	2	28	114
Child	C14	2007-09-02	M	BACD	2018-10-03	11.0932	C	VP	3	27	107
Child	C15	2006-02-07	F	CDAB	2018-03-27	12.1397	C	VP	1	25	94
Child	C16	2010-05-24	F	DBAC	2018-10-11	8.38904	C	VP	4	26	113
Child	C17	2009-01-06	M	BADC	2018-07-22	9.54521	C	VP	4	18	77
Child	C18	2005-10-23	M	DABC	2018-07-22	12.7534	C	VP	4	25	92
Child	C19	2011-03-24	F	CBDA	2018-07-01	7.27671	C	VP	1	17	89
Child	C20	2009-11-26	F	ADCB	2018-09-01	8.76986	C	VP	3	24	99
Child	C1	2007-08-28	F	DCAB	2018-02-25	10.5041	D	VP	1	24	98
Child	C2	2010-09-30	F	ABDC	2018-03-10	7.44658	D	VP	3	13	67
Child	C3	2010-11-04	F	ADBC	2018-03-10	7.35068	D	VP	2	24	113
Child	C4	2007-08-17	F	CADB	2018-04-08	10.6493	D	VP	3	28	112
Child	C5	2009-03-25	M	CBAD	2018-05-27	9.17808	D	VP	4	28	118
Child	C6	2006-04-07	M	ABCD	2018-06-01	12.1589	D	VP	4	20	73
Child	C7	2010-09-27	F	BACD	2018-06-01	7.68219	D	VP	4	21	99
Child	C8	2005-04-07	M	DACB	2018-03-23	12.9671	D	VP	1	18	56
Child	C9	2007-06-29	F	BCDA	2018-03-23	10.7397	D	VP	3	27	108
Child	C10	2008-11-18	M	CADB	2018-07-15	9.66027	D	VP	3	24	99
Child	C11	2011-06-02	F	BDCA	2018-04-07	6.85205	D	VP	2	19	99
Child	C12	2007-05-12	M	DACB	2018-03-26	10.8795	D	VP	1	27	108
Child	C13	2008-04-04	F	ACDB	2018-04-21	10.0521	D	VP	3	26	107
Child	C14	2007-09-02	M	BACD	2018-11-28	11.2466	D	VP	4	29	114
Child	C15	2006-02-07	F	CDAB	2018-04-03	12.1589	D	VP	2	27	102
Child	C16	2010-05-24	F	DBAC	2018-04-08	7.87945	D	VP	1	20	96
Child	C17	2009-01-06	M	BADC	2018-07-15	9.52603	D	VP	3	23	98
Child	C18	2005-10-23	M	DABC	2018-07-01	12.6959	D	VP	1	28	104
Child	C19	2011-03-24	F	CBDA	2018-07-15	7.31507	D	VP	3	17	85
Child	C20	2009-11-26	F	ADCB	2018-08-04	8.69315	D	VP	2	27	111
Child	C1	2007-08-28	F	DCAB	2018-04-16	10.6411	A	MC	3	27	105
Child	C2	2010-09-30	F	ABDC	2018-02-25	7.41096	A	MC	1	15	79
Child	C3	2010-11-04	F	ADBC	2018-02-25	7.31507	A	MC	1	17	86
Child	C4	2007-08-17	F	CADB	2018-04-01	10.6301	A	MC	2	23	88
Child	C5	2009-03-25	M	CBAD	2018-04-08	9.04384	A	MC	3	19	81
Child	C6	2006-04-07	M	ABCD	2018-03-20	11.9589	A	MC	1	26	98
Child	C7	2010-09-27	F	BACD	2018-04-04	7.52329	A	MC	2	16	82
Child	C8	2005-04-07	M	DACB	2018-04-01	12.9918	A	MC	2	20	69
Child	C9	2007-06-29	F	BCDA	2018-03-31	10.7616	A	MC	4	21	80
Child	C10	2008-11-18	M	CADB	2018-04-06	9.3863	A	MC	2	24	98
Child	C11	2011-06-02	F	BDCA	2018-08-12	7.2	A	MC	4	14	78
Child	C12	2007-05-12	M	DACB	2018-04-03	10.9014	A	MC	2	29	112
Child	C13	2008-04-04	F	ACDB	2018-03-26	9.98082	A	MC	1	23	90
Child	C14	2007-09-02	M	BACD	2018-04-09	10.6082	A	MC	2	28	107
Child	C15	2006-02-07	F	CDAB	2018-04-18	12.2	A	MC	3	23	86
Child	C16	2010-05-24	F	DBAC	2018-09-19	8.32877	A	MC	3	15	70
Child	C17	2009-01-06	M	BADC	2018-07-08	9.50685	A	MC	2	23	93
Child	C18	2005-10-23	M	DABC	2018-07-08	12.7151	A	MC	2	19	66
Child	C19	2011-03-24	F	CBDA	2018-07-22	7.33425	A	MC	4	16	82
Child	C20	2009-11-26	F	ADCB	2018-07-28	8.67397	A	MC	1	22	87
Child	C1	2007-08-28	F	DCAB	2018-08-26	11.0027	B	MC	4	26	99
Child	C2	2010-09-30	F	ABDC	2018-03-04	7.43014	B	MC	2	16	82
Child	C3	2010-11-04	F	ADBC	2018-04-11	7.43836	B	MC	3	20	98
Child	C4	2007-08-17	F	CADB	2018-05-27	10.7836	B	MC	4	22	84
Child	C5	2009-03-25	M	CBAD	2018-04-01	9.02466	B	MC	2	19	81
Child	C6	2006-04-07	M	ABCD	2018-04-04	12	B	MC	2	21	78
Child	C7	2010-09-27	F	BACD	2018-03-20	7.48219	B	MC	1	15	79
Child	C8	2005-04-07	M	DACB	2018-04-15	13.0301	B	MC	4	16	46
Child	C9	2007-06-29	F	BCDA	2018-03-23	10.7397	B	MC	1	20	77
Child	C10	2008-11-18	M	CADB	2018-08-12	9.73699	B	MC	4	20	79
Child	C11	2011-06-02	F	BDCA	2018-03-25	6.81644	B	MC	1	18	96
Child	C12	2007-05-12	M	DACB	2018-09-28	11.389	B	MC	4	28	106
Child	C13	2008-04-04	F	ACDB	2018-04-21	10.0521	B	MC	4	23	90
Child	C14	2007-09-02	M	BACD	2018-03-26	10.5699	B	MC	1	25	97
Child	C15	2006-02-07	F	CDAB	2018-05-21	12.2904	B	MC	4	24	90
Child	C16	2010-05-24	F	DBAC	2018-08-08	8.2137	B	MC	2	15	73
Child	C17	2009-01-06	M	BADC	2018-07-01	9.48767	B	MC	1	21	85
Child	C18	2005-10-23	M	DABC	2018-07-15	12.7342	B	MC	3	21	77
Child	C19	2011-03-24	F	CBDA	2018-07-08	7.29589	B	MC	2	18	89
Child	C20	2009-11-26	F	ADCB	2018-09-15	8.80822	B	MC	4	22	87
Child	C1	2007-08-28	F	DCAB	2018-03-10	10.5397	C	MC	2	22	85
Child	C2	2010-09-30	F	ABDC	2018-03-26	7.49041	C	MC	4	16	82
Child	C3	2010-11-04	F	ADBC	2018-06-04	7.5863	C	MC	4	20	98
Child	C4	2007-08-17	F	CADB	2018-03-03	10.5507	C	MC	1	26	101
Child	C5	2009-03-25	M	CBAD	2018-03-03	8.94521	C	MC	1	20	84
Child	C6	2006-04-07	M	ABCD	2018-04-11	12.0192	C	MC	3	16	51
Child	C7	2010-09-27	F	BACD	2018-04-11	7.54247	C	MC	3	14	75
Child	C8	2005-04-07	M	DACB	2018-04-08	13.011	C	MC	3	20	69
Child	C9	2007-06-29	F	BCDA	2018-04-15	10.8027	C	MC	2	17	61
Child	C10	2008-11-18	M	CADB	2018-03-25	9.35342	C	MC	1	17	69
Child	C11	2011-06-02	F	BDCA	2018-07-15	7.12329	C	MC	3	12	66
Child	C12	2007-05-12	M	DACB	2018-07-15	11.1836	C	MC	3	24	91
Child	C13	2008-04-04	F	ACDB	2018-04-03	10.0027	C	MC	2	25	98
Child	C14	2007-09-02	M	BACD	2018-10-03	11.0932	C	MC	3	23	87
Child	C15	2006-02-07	F	CDAB	2018-03-27	12.1397	C	MC	1	22	82
Child	C16	2010-05-24	F	DBAC	2018-10-11	8.38904	C	MC	4	13	59
Child	C17	2009-01-06	M	BADC	2018-07-22	9.54521	C	MC	4	13	47
Child	C18	2005-10-23	M	DABC	2018-07-22	12.7534	C	MC	4	17	56
Child	C19	2011-03-24	F	CBDA	2018-07-01	7.27671	C	MC	1	11	61
Child	C20	2009-11-26	F	ADCB	2018-09-01	8.76986	C	MC	3	24	96
Child	C1	2007-08-28	F	DCAB	2018-02-25	10.5041	D	MC	1	21	81
Child	C2	2010-09-30	F	ABDC	2018-03-10	7.44658	D	MC	3	14	75
Child	C3	2010-11-04	F	ADBC	2018-03-10	7.35068	D	MC	2	17	86
Child	C4	2007-08-17	F	CADB	2018-04-08	10.6493	D	MC	3	23	88
Child	C5	2009-03-25	M	CBAD	2018-05-27	9.17808	D	MC	4	18	77
Child	C6	2006-04-07	M	ABCD	2018-06-01	12.1589	D	MC	4	13	45
Child	C7	2010-09-27	F	BACD	2018-06-01	7.68219	D	MC	4	15	77
Child	C8	2005-04-07	M	DACB	2018-03-23	12.9671	D	MC	1	17	52
Child	C9	2007-06-29	F	BCDA	2018-03-23	10.7397	D	MC	3	17	61
Child	C10	2008-11-18	M	CADB	2018-07-15	9.66027	D	MC	3	21	83
Child	C11	2011-06-02	F	BDCA	2018-04-07	6.85205	D	MC	2	15	84
Child	C12	2007-05-12	M	DACB	2018-03-26	10.8795	D	MC	1	24	92
Child	C13	2008-04-04	F	ACDB	2018-04-21	10.0521	D	MC	3	22	86
Child	C14	2007-09-02	M	BACD	2018-11-28	11.2466	D	MC	4	26	99
Child	C15	2006-02-07	F	CDAB	2018-04-03	12.1589	D	MC	2	21	78
Child	C16	2010-05-24	F	DBAC	2018-04-08	7.87945	D	MC	1	16	80
Child	C17	2009-01-06	M	BADC	2018-07-15	9.52603	D	MC	3	16	63
Child	C18	2005-10-23	M	DABC	2018-07-01	12.6959	D	MC	1	20	71
Child	C19	2011-03-24	F	CBDA	2018-07-15	7.31507	D	MC	3	17	86
Child	C20	2009-11-26	F	ADCB	2018-08-04	8.69315	D	MC	2	24	96
Adult	A1	1989-04-09	F	BDCA	2018-10-12	29.5288	A	VMI	4	29	103
Adult	A2	1993-05-26	F	ABDC	2018-02-21	24.7589	A	VMI	1	26	87
Adult	A3	1978-03-23	M	CDAB	2018-05-26	40.2027	A	VMI	3	27	97
Adult	A4	1980-06-10	F	ACDB	2018-02-25	37.737	A	VMI	1	30	107
Adult	A5	1980-06-29	M	BACD	2018-06-04	37.9562	A	VMI	2	27	92
Adult	A6	1996-02-16	F	BDAC	2018-03-21	22.1068	A	VMI	3	23	72
Adult	A7	1974-10-09	M	ABCD	2018-03-03	43.4274	A	VMI	1	29	108
Adult	A8	1978-06-06	F	DACB	2018-03-31	39.8438	A	VMI	2	29	103
Adult	A9	1977-06-14	F	DBCA	2018-08-12	41.189	A	VMI	4	28	103
Adult	A10	1979-04-26	M	CABD	2018-03-10	38.8986	A	VMI	2	25	83
Adult	A11	1986-07-21	F	ADBC	2018-08-22	32.1096	A	VMI	1	29	103
Adult	A12	1974-06-30	M	BCDA	2018-08-12	44.1479	A	VMI	4	24	84
Adult	A13	1983-12-23	F	DCBA	2018-08-11	34.6575	A	VMI	4	28	98
Adult	A14	1972-12-28	F	BADC	2018-04-06	45.3014	A	VMI	2	28	103
Adult	A15	1986-02-28	F	CBAD	2018-10-12	32.6411	A	VMI	3	23	72
Adult	A17	1977-11-27	F	CBDA	2018-10-11	40.8986	A	VMI	4	30	113
Adult	A18	1973-06-25	F	ADCB	2018-07-28	45.1205	A	VMI	1	23	77
Adult	A19	1979-08-31	M	DCAB	2018-08-11	38.9726	A	VMI	3	26	87
Adult	A20	1981-03-04	M	CADB	2018-09-12	37.5507	A	VMI	2	29	103
Adult	A1	1989-04-09	F	BDCA	2018-02-21	28.8904	B	VMI	1	29	103
Adult	A2	1993-05-26	F	ABDC	2018-03-01	24.7808	B	VMI	2	23	72
Adult	A3	1978-03-23	M	CDAB	2018-11-27	40.7096	B	VMI	4	24	77
Adult	A4	1980-06-10	F	ACDB	2018-07-15	38.1205	B	VMI	4	27	92
Adult	A5	1980-06-29	M	BACD	2018-02-25	37.6849	B	VMI	1	20	50
Adult	A6	1996-02-16	F	BDAC	2018-03-03	22.0575	B	VMI	1	19	45
Adult	A7	1974-10-09	M	ABCD	2018-03-31	43.5041	B	VMI	2	25	87
Adult	A8	1978-06-06	F	DACB	2018-05-27	40	B	VMI	4	29	108
Adult	A9	1977-06-14	F	DBCA	2018-03-10	40.7644	B	VMI	2	26	92
Adult	A10	1979-04-26	M	CABD	2018-04-15	38.9973	B	VMI	3	27	92
Adult	A11	1986-07-21	F	ADBC	2018-09-24	32.2	B	VMI	2	29	103
Adult	A12	1974-06-30	M	BCDA	2018-03-25	43.7644	B	VMI	1	23	77
Adult	A13	1983-12-23	F	DCBA	2018-07-12	34.5753	B	VMI	3	27	92
Adult	A14	1972-12-28	F	BADC	2018-03-26	45.2712	B	VMI	1	25	87
Adult	A15	1986-02-28	F	CBAD	2018-07-27	32.4301	B	VMI	2	22	66
Adult	A17	1977-11-27	F	CBDA	2018-07-08	40.6384	B	VMI	2	28	103
Adult	A18	1973-06-25	F	ADCB	2018-09-15	45.2548	B	VMI	4	27	97
Adult	A19	1979-08-31	M	DCAB	2018-10-04	39.1205	B	VMI	4	24	77
Adult	A20	1981-03-04	M	CADB	2018-10-03	37.6082	B	VMI	4	27	92
Adult	A1	1989-04-09	F	BDCA	2018-02-21	28.8904	C	VMI	3	28	98
Adult	A2	1993-05-26	F	ABDC	2018-03-01	24.7808	C	VMI	4	21	57
Adult	A3	1978-03-23	M	CDAB	2018-11-27	40.7096	C	VMI	1	26	77
Adult	A4	1980-06-10	F	ACDB	2018-07-15	38.1205	C	VMI	2	24	77
Adult	A5	1980-06-29	M	BACD	2018-02-25	37.6849	C	VMI	3	24	77
Adult	A6	1996-02-16	F	BDAC	2018-03-03	22.0575	C	VMI	4	21	57
Adult	A7	1974-10-09	M	ABCD	2018-03-31	43.5041	C	VMI	1	20	58
Adult	A8	1978-06-06	F	DACB	2018-05-27	40	C	VMI	4	30	107
Adult	A9	1977-06-14	F	DBCA	2018-03-10	40.7644	C	VMI	4	28	103
Adult	A10	1979-04-26	M	CABD	2018-04-15	38.9973	C	VMI	1	22	66
Adult	A11	1986-07-21	F	ADBC	2018-09-24	32.2	C	VMI	4	29	103
Adult	A12	1974-06-30	M	BCDA	2018-03-25	43.7644	C	VMI	2	24	84
Adult	A13	1983-12-23	F	DCBA	2018-07-12	34.5753	C	VMI	2	29	103
Adult	A14	1972-12-28	F	BADC	2018-03-26	45.2712	C	VMI	4	24	84
Adult	A15	1986-02-28	F	CBAD	2018-07-27	32.4301	C	VMI	1	24	77
Adult	A17	1977-11-27	F	CBDA	2018-07-08	40.6384	C	VMI	1	25	87
Adult	A18	1973-06-25	F	ADCB	2018-09-15	45.2548	C	VMI	3	21	65
Adult	A19	1979-08-31	M	DCAB	2018-10-04	39.1205	C	VMI	2	23	72
Adult	A20	1981-03-04	M	CADB	2018-10-03	37.6082	C	VMI	1	19	45
Adult	A1	1989-04-09	F	BDCA	2018-03-22	28.9699	D	VMI	2	28	98
Adult	A2	1993-05-26	F	ABDC	2018-03-08	24.8	D	VMI	3	23	72
Adult	A3	1978-03-23	M	CDAB	2018-03-10	39.9918	D	VMI	2	25	83
Adult	A4	1980-06-10	F	ACDB	2018-04-11	37.8603	D	VMI	3	28	98
Adult	A5	1980-06-29	M	BACD	2018-07-15	38.0685	D	VMI	4	25	83
Adult	A6	1996-02-16	F	BDAC	2018-03-10	22.0767	D	VMI	2	22	66
Adult	A7	1974-10-09	M	ABCD	2018-05-27	43.6603	D	VMI	4	25	87
Adult	A8	1978-06-06	F	DACB	2018-03-03	39.7671	D	VMI	1	27	92
Adult	A9	1977-06-14	F	DBCA	2018-03-04	40.7479	D	VMI	1	25	87
Adult	A10	1979-04-26	M	CABD	2018-08-12	39.3233	D	VMI	4	24	77
Adult	A11	1986-07-21	F	ADBC	2018-09-12	32.1671	D	VMI	2	30	107
Adult	A12	1974-06-30	M	BCDA	2018-07-15	44.0712	D	VMI	3	25	87
Adult	A13	1983-12-23	F	DCBA	2018-03-26	34.2795	D	VMI	1	27	92
Adult	A14	1972-12-28	F	BADC	2018-07-15	45.5753	D	VMI	3	27	97
Adult	A15	1986-02-28	F	CBAD	2018-11-27	32.7671	D	VMI	4	22	66
Adult	A17	1977-11-27	F	CBDA	2018-10-03	40.8767	D	VMI	3	25	87
Adult	A18	1973-06-25	F	ADCB	2018-08-04	45.1397	D	VMI	2	20	50
Adult	A19	1979-08-31	M	DCAB	2018-07-28	38.9342	D	VMI	1	26	87
Adult	A20	1981-03-04	M	CADB	2018-09-24	37.5836	D	VMI	3	29	103
Adult	A1	1989-04-09	F	BDCA	2018-10-12	29.5288	A	VP	4	30	107
Adult	A2	1993-05-26	F	ABDC	2018-02-21	24.7589	A	VP	1	27	92
Adult	A3	1978-03-23	M	CDAB	2018-05-26	40.2027	A	VP	3	29	97
Adult	A4	1980-06-10	F	ACDB	2018-02-25	37.737	A	VP	1	28	97
Adult	A5	1980-06-29	M	BACD	2018-06-04	37.9562	A	VP	2	27	92
Adult	A6	1996-02-16	F	BDAC	2018-03-21	22.1068	A	VP	3	28	97
Adult	A7	1974-10-09	M	ABCD	2018-03-03	43.4274	A	VP	1	29	101
Adult	A8	1978-06-06	F	DACB	2018-03-31	39.8438	A	VP	2	28	97
Adult	A9	1977-06-14	F	DBCA	2018-08-12	41.189	A	VP	4	30	107
Adult	A10	1979-04-26	M	CABD	2018-03-10	38.8986	A	VP	2	30	107
Adult	A11	1986-07-21	F	ADBC	2018-08-22	32.1096	A	VP	1	29	101
Adult	A12	1974-06-30	M	BCDA	2018-08-12	44.1479	A	VP	4	29	101
Adult	A13	1983-12-23	F	DCBA	2018-08-11	34.6575	A	VP	4	29	101
Adult	A14	1972-12-28	F	BADC	2018-04-06	45.3014	A	VP	2	28	97
Adult	A15	1986-02-28	F	CBAD	2018-10-12	32.6411	A	VP	3	28	97
Adult	A17	1977-11-27	F	CBDA	2018-10-11	40.8986	A	VP	4	29	101
Adult	A18	1973-06-25	F	ADCB	2018-07-28	45.1205	A	VP	1	27	92
Adult	A19	1979-08-31	M	DCAB	2018-08-11	38.9726	A	VP	3	29	101
Adult	A20	1981-03-04	M	CADB	2018-09-12	37.5507	A	VP	2	30	107
Adult	A1	1989-04-09	F	BDCA	2018-02-21	28.8904	B	VP	1	30	107
Adult	A2	1993-05-26	F	ABDC	2018-03-01	24.7808	B	VP	2	29	101
Adult	A3	1978-03-23	M	CDAB	2018-11-27	40.7096	B	VP	4	26	84
Adult	A4	1980-06-10	F	ACDB	2018-07-15	38.1205	B	VP	4	30	107
Adult	A5	1980-06-29	M	BACD	2018-02-25	37.6849	B	VP	1	25	81
Adult	A6	1996-02-16	F	BDAC	2018-03-03	22.0575	B	VP	1	28	97
Adult	A7	1974-10-09	M	ABCD	2018-03-31	43.5041	B	VP	2	28	97
Adult	A8	1978-06-06	F	DACB	2018-05-27	40	B	VP	4	28	97
Adult	A9	1977-06-14	F	DBCA	2018-03-10	40.7644	B	VP	2	29	101
Adult	A10	1979-04-26	M	CABD	2018-04-15	38.9973	B	VP	3	30	107
Adult	A11	1986-07-21	F	ADBC	2018-09-24	32.2	B	VP	2	30	107
Adult	A12	1974-06-30	M	BCDA	2018-03-25	43.7644	B	VP	1	30	107
Adult	A13	1983-12-23	F	DCBA	2018-07-12	34.5753	B	VP	3	30	107
Adult	A14	1972-12-28	F	BADC	2018-03-26	45.2712	B	VP	1	26	86
Adult	A15	1986-02-28	F	CBAD	2018-07-27	32.4301	B	VP	2	26	86
Adult	A17	1977-11-27	F	CBDA	2018-07-08	40.6384	B	VP	2	27	100
Adult	A18	1973-06-25	F	ADCB	2018-09-15	45.2548	B	VP	4	25	81
Adult	A19	1979-08-31	M	DCAB	2018-10-04	39.1205	B	VP	4	28	97
Adult	A20	1981-03-04	M	CADB	2018-10-03	37.6082	B	VP	4	29	101
Adult	A1	1989-04-09	F	BDCA	2018-02-21	28.8904	C	VP	3	30	107
Adult	A2	1993-05-26	F	ABDC	2018-03-01	24.7808	C	VP	4	29	101
Adult	A3	1978-03-23	M	CDAB	2018-11-27	40.7096	C	VP	1	25	81
Adult	A4	1980-06-10	F	ACDB	2018-07-15	38.1205	C	VP	2	27	92
Adult	A5	1980-06-29	M	BACD	2018-02-25	37.6849	C	VP	3	27	92
Adult	A6	1996-02-16	F	BDAC	2018-03-03	22.0575	C	VP	4	29	101
Adult	A7	1974-10-09	M	ABCD	2018-03-31	43.5041	C	VP	1	27	92
Adult	A8	1978-06-06	F	DACB	2018-05-27	40	C	VP	4	27	92
Adult	A9	1977-06-14	F	DBCA	2018-03-10	40.7644	C	VP	4	29	101
Adult	A10	1979-04-26	M	CABD	2018-04-15	38.9973	C	VP	1	29	101
Adult	A11	1986-07-21	F	ADBC	2018-09-24	32.2	C	VP	4	30	107
Adult	A12	1974-06-30	M	BCDA	2018-03-25	43.7644	C	VP	2	30	107
Adult	A13	1983-12-23	F	DCBA	2018-07-12	34.5753	C	VP	2	30	113
Adult	A14	1972-12-28	F	BADC	2018-03-26	45.2712	C	VP	4	27	92
Adult	A15	1986-02-28	F	CBAD	2018-07-27	32.4301	C	VP	1	28	97
Adult	A17	1977-11-27	F	CBDA	2018-07-08	40.6384	C	VP	1	27	92
Adult	A18	1973-06-25	F	ADCB	2018-09-15	45.2548	C	VP	3	20	51
Adult	A19	1979-08-31	M	DCAB	2018-10-04	39.1205	C	VP	2	25	81
Adult	A20	1981-03-04	M	CADB	2018-10-03	37.6082	C	VP	1	30	107
Adult	A1	1989-04-09	F	BDCA	2018-03-22	28.9699	D	VP	2	30	107
Adult	A2	1993-05-26	F	ABDC	2018-03-08	24.8	D	VP	3	25	81
Adult	A3	1978-03-23	M	CDAB	2018-03-10	39.9918	D	VP	2	30	107
Adult	A4	1980-06-10	F	ACDB	2018-04-11	37.8603	D	VP	3	27	92
Adult	A5	1980-06-29	M	BACD	2018-07-15	38.0685	D	VP	4	27	91
Adult	A6	1996-02-16	F	BDAC	2018-03-10	22.0767	D	VP	2	27	92
Adult	A7	1974-10-09	M	ABCD	2018-05-27	43.6603	D	VP	4	28	97
Adult	A8	1978-06-06	F	DACB	2018-03-03	39.7671	D	VP	1	28	97
Adult	A9	1977-06-14	F	DBCA	2018-03-04	40.7479	D	VP	1	30	107
Adult	A10	1979-04-26	M	CABD	2018-08-12	39.3233	D	VP	4	29	101
Adult	A11	1986-07-21	F	ADBC	2018-09-12	32.1671	D	VP	2	29	101
Adult	A12	1974-06-30	M	BCDA	2018-07-15	44.0712	D	VP	3	27	92
Adult	A13	1983-12-23	F	DCBA	2018-03-26	34.2795	D	VP	1	29	101
Adult	A14	1972-12-28	F	BADC	2018-07-15	45.5753	D	VP	3	28	97
Adult	A15	1986-02-28	F	CBAD	2018-11-27	32.7671	D	VP	4	28	97
Adult	A17	1977-11-27	F	CBDA	2018-10-03	40.8767	D	VP	3	29	101
Adult	A18	1973-06-25	F	ADCB	2018-08-04	45.1397	D	VP	2	23	72
Adult	A19	1979-08-31	M	DCAB	2018-07-28	38.9342	D	VP	1	27	92
Adult	A20	1981-03-04	M	CADB	2018-09-24	37.5836	D	VP	3	29	101
Adult	A1	1989-04-09	F	BDCA	2018-10-12	29.5288	A	MC	4	30	107
Adult	A2	1993-05-26	F	ABDC	2018-02-21	24.7589	A	MC	1	29	102
Adult	A3	1978-03-23	M	CDAB	2018-05-26	40.2027	A	MC	3	29	102
Adult	A4	1980-06-10	F	ACDB	2018-02-25	37.737	A	MC	1	29	102
Adult	A5	1980-06-29	M	BACD	2018-06-04	37.9562	A	MC	2	30	107
Adult	A6	1996-02-16	F	BDAC	2018-03-21	22.1068	A	MC	3	29	102
Adult	A7	1974-10-09	M	ABCD	2018-03-03	43.4274	A	MC	1	27	92
Adult	A8	1978-06-06	F	DACB	2018-03-31	39.8438	A	MC	2	30	107
Adult	A9	1977-06-14	F	DBCA	2018-08-12	41.189	A	MC	4	30	107
Adult	A10	1979-04-26	M	CABD	2018-03-10	38.8986	A	MC	2	22	64
Adult	A11	1986-07-21	F	ADBC	2018-08-22	32.1096	A	MC	1	29	102
Adult	A12	1974-06-30	M	BCDA	2018-08-12	44.1479	A	MC	4	24	76
Adult	A13	1983-12-23	F	DCBA	2018-08-11	34.6575	A	MC	4	29	102
Adult	A14	1972-12-28	F	BADC	2018-04-06	45.3014	A	MC	2	30	107
Adult	A15	1986-02-28	F	CBAD	2018-10-12	32.6411	A	MC	3	29	102
Adult	A17	1977-11-27	F	CBDA	2018-10-11	40.8986	A	MC	4	26	86
Adult	A18	1973-06-25	F	ADCB	2018-07-28	45.1205	A	MC	1	25	91
Adult	A19	1979-08-31	M	DCAB	2018-08-11	38.9726	A	MC	3	28	97
Adult	A20	1981-03-04	M	CADB	2018-09-12	37.5507	A	MC	2	30	107
Adult	A1	1989-04-09	F	BDCA	2018-02-21	28.8904	B	MC	1	30	107
Adult	A2	1993-05-26	F	ABDC	2018-03-01	24.7808	B	MC	2	27	92
Adult	A3	1978-03-23	M	CDAB	2018-11-27	40.7096	B	MC	4	27	92
Adult	A4	1980-06-10	F	ACDB	2018-07-15	38.1205	B	MC	4	29	102
Adult	A5	1980-06-29	M	BACD	2018-02-25	37.6849	B	MC	1	26	86
Adult	A6	1996-02-16	F	BDAC	2018-03-03	22.0575	B	MC	1	27	92
Adult	A7	1974-10-09	M	ABCD	2018-03-31	43.5041	B	MC	2	24	76
Adult	A8	1978-06-06	F	DACB	2018-05-27	40	B	MC	4	29	102
Adult	A9	1977-06-14	F	DBCA	2018-03-10	40.7644	B	MC	2	27	92
Adult	A10	1979-04-26	M	CABD	2018-04-15	38.9973	B	MC	3	27	92
Adult	A11	1986-07-21	F	ADBC	2018-09-24	32.2	B	MC	2	30	107
Adult	A12	1974-06-30	M	BCDA	2018-03-25	43.7644	B	MC	1	23	71
Adult	A13	1983-12-23	F	DCBA	2018-07-12	34.5753	B	MC	3	27	92
Adult	A14	1972-12-28	F	BADC	2018-03-26	45.2712	B	MC	1	24	76
Adult	A15	1986-02-28	F	CBAD	2018-07-27	32.4301	B	MC	2	26	86
Adult	A17	1977-11-27	F	CBDA	2018-07-08	40.6384	B	MC	2	25	81
Adult	A18	1973-06-25	F	ADCB	2018-09-15	45.2548	B	MC	4	22	64
Adult	A19	1979-08-31	M	DCAB	2018-10-04	39.1205	B	MC	4	27	92
Adult	A20	1981-03-04	M	CADB	2018-10-03	37.6082	B	MC	4	29	102
Adult	A1	1989-04-09	F	BDCA	2018-02-21	28.8904	C	MC	3	29	101
Adult	A2	1993-05-26	F	ABDC	2018-03-01	24.7808	C	MC	4	24	76
Adult	A3	1978-03-23	M	CDAB	2018-11-27	40.7096	C	MC	1	24	76
Adult	A4	1980-06-10	F	ACDB	2018-07-15	38.1205	C	MC	2	25	81
Adult	A5	1980-06-29	M	BACD	2018-02-25	37.6849	C	MC	3	25	81
Adult	A6	1996-02-16	F	BDAC	2018-03-03	22.0575	C	MC	4	27	92
Adult	A7	1974-10-09	M	ABCD	2018-03-31	43.5041	C	MC	1	23	71
Adult	A8	1978-06-06	F	DACB	2018-05-27	40	C	MC	4	30	107
Adult	A9	1977-06-14	F	DBCA	2018-03-10	40.7644	C	MC	4	29	102
Adult	A10	1979-04-26	M	CABD	2018-04-15	38.9973	C	MC	1	21	56
Adult	A11	1986-07-21	F	ADBC	2018-09-24	32.2	C	MC	4	30	107
Adult	A12	1974-06-30	M	BCDA	2018-03-25	43.7644	C	MC	2	24	76
Adult	A13	1983-12-23	F	DCBA	2018-07-12	34.5753	C	MC	2	26	95
Adult	A14	1972-12-28	F	BADC	2018-03-26	45.2712	C	MC	4	25	81
Adult	A15	1986-02-28	F	CBAD	2018-07-27	32.4301	C	MC	1	25	81
Adult	A17	1977-11-27	F	CBDA	2018-07-08	40.6384	C	MC	1	23	71
Adult	A18	1973-06-25	F	ADCB	2018-09-15	45.2548	C	MC	3	22	64
Adult	A19	1979-08-31	M	DCAB	2018-10-04	39.1205	C	MC	2	28	97
Adult	A20	1981-03-04	M	CADB	2018-10-03	37.6082	C	MC	1	29	102
Adult	A1	1989-04-09	F	BDCA	2018-03-22	28.9699	D	MC	2	30	107
Adult	A2	1993-05-26	F	ABDC	2018-03-08	24.8	D	MC	3	29	102
Adult	A3	1978-03-23	M	CDAB	2018-03-10	39.9918	D	MC	2	29	102
Adult	A4	1980-06-10	F	ACDB	2018-04-11	37.8603	D	MC	3	25	81
Adult	A5	1980-06-29	M	BACD	2018-07-15	38.0685	D	MC	4	27	92
Adult	A6	1996-02-16	F	BDAC	2018-03-10	22.0767	D	MC	2	26	86
Adult	A7	1974-10-09	M	ABCD	2018-05-27	43.6603	D	MC	4	22	64
Adult	A8	1978-06-06	F	DACB	2018-03-03	39.7671	D	MC	1	28	97
Adult	A9	1977-06-14	F	DBCA	2018-03-04	40.7479	D	MC	1	29	102
Adult	A10	1979-04-26	M	CABD	2018-08-12	39.3233	D	MC	4	23	71
Adult	A11	1986-07-21	F	ADBC	2018-09-12	32.1671	D	MC	2	30	107
Adult	A12	1974-06-30	M	BCDA	2018-07-15	44.0712	D	MC	3	23	71
Adult	A13	1983-12-23	F	DCBA	2018-03-26	34.2795	D	MC	1	29	102
Adult	A14	1972-12-28	F	BADC	2018-07-15	45.5753	D	MC	3	20	47
Adult	A15	1986-02-28	F	CBAD	2018-11-27	32.7671	D	MC	4	27	92
Adult	A17	1977-11-27	F	CBDA	2018-10-03	40.8767	D	MC	3	24	76
Adult	A18	1973-06-25	F	ADCB	2018-08-04	45.1397	D	MC	2	25	81
Adult	A19	1979-08-31	M	DCAB	2018-07-28	38.9342	D	MC	1	26	86
Adult	A20	1981-03-04	M	CADB	2018-09-24	37.5836	D	MC	3	29	102

## Sheet: Test design
Test	Form	Overall size mm	Mean size for row mm (MC)	Critical detail size mm	MAR at 40cm min of arc	LogMAR at 40cm	Separation form and crowding source mm	Mean separation for row mm (MC)	Angular separation
VMI	All	50.6		1.3	11	1.04	84.2		12
VP	4-9	20		0.7	6	0.78	15.5		2.2
VP	10-16	17.5		0.5	4	0.6	12.5		1.8
VP	17-30	10		0.3	2	0.3	6		0.9
MC	4	50.6		4	34	1.53
MC	5	50.6		4	34	1.53
MC	6	51.5	50.9	4	34	1.53
MC	7	50.9		4	34	1.53
MC	8	51.2		4	34	1.53	46.2
MC	9	51.1		4	34	1.53	64.3
MC	10	53.1		4	34	1.53	62.4
MC	11	50.8	51.42	4	34	1.53	53.7	56.65	8.1
MC	12	44.2		2.5	20	1.3
MC	13	44.5		2.5	20	1.3	57
MC	14	44.1		2.5	20	1.3	49.6
MC	15	48		2.5	20	1.3	58.8
MC	16	43.3	44.82	2.5	20	1.3	57.2	55.65	7.9
MC	17	44.8		1.7	14	1.15
MC	18	49.7		1.7	14	1.15	53.9
MC	19	47.1		1.7	14	1.15	56
MC	20	46.2		1.7	14	1.15	55.4
MC	21	42.2	46	1.7	14	1.15	56	55.325	7.9
MC	22	38.2		0.3	2	0.3
MC	23	38.5		0.3	2	0.3	36.1
MC	24	38.5		0.3	2	0.3	41.6
MC	25	45		0.3	2	0.3	44.3
MC	26	38.2		0.3	2	0.3	43.6
MC	27	38.2	39.4333	0.3	2	0.3	60.3	45.18	6.4
MC	28	26.1		0.3	2	0.3
MC	29	25.6		0.3	2	0.3	46.1
MC	30	29.2	26.9667	0.3	2	0.3	51.5	48.8	7
